# Supplementary material for: One step in situ synthesis of ZnS/N and S co-doped carbon composites via salt templating for lithium-ion battery applications
Source: Royal Society of Chemistry journal article supplement (doi:10.1039/c9nj02488c), 2019-01-01
Supplement: c9nj02488c1.pdf [file c9nj02488c1.pdf]

## Supporting Information List of Figures:

**Figure S1.**  $^1\text{H}$  and  $^{13}\text{C}$  NMR of 2-amino-4-phenyl thiazole

**Figure S2.** XPS survey spectra of ZnS/NSC-800 and ZnS/NSC-900

**Figure S3.** FESEM image of cross-sectioned ZnS/NSC-800 electrode

**Figure S4.** Elemental mapping images and the corresponding EDX spectra of ZnS/NSC-800

**Figure S5.** EDX line profile of ZnS/NSC-900

**Figure S6.** XRD diffraction pattern of the TGA residue

**Figure S7.** Cyclic voltammogram of (a) Bare ZnS (b) ZnS/NSC-800 and (c) ZnS/NSC-900

**Figure S8.** Cycling stability of bare ZnS

**Figure S9.** Comparison of Ohmic drop (Resistance) after cycling

## Supporting Information

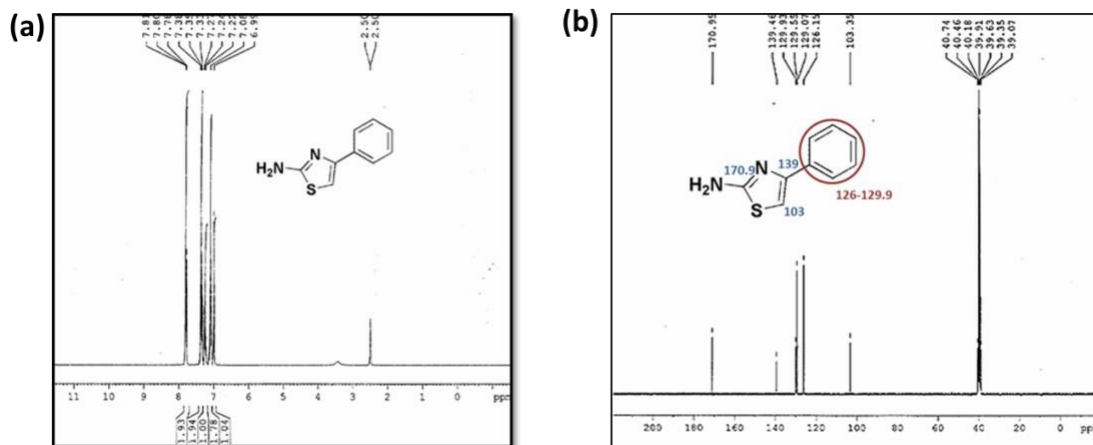

**Figure S1.**  $^1\text{H}$  and  $^{13}\text{C}$  NMR of 2-amino-4-phenyl thiazole

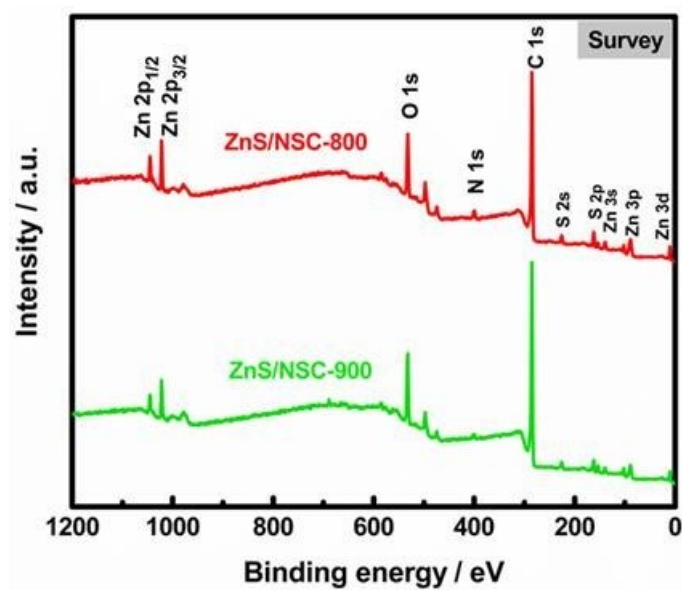

Figure S2. XPS survey spectra of ZnS/NSC-800 and ZnS/NSC-900

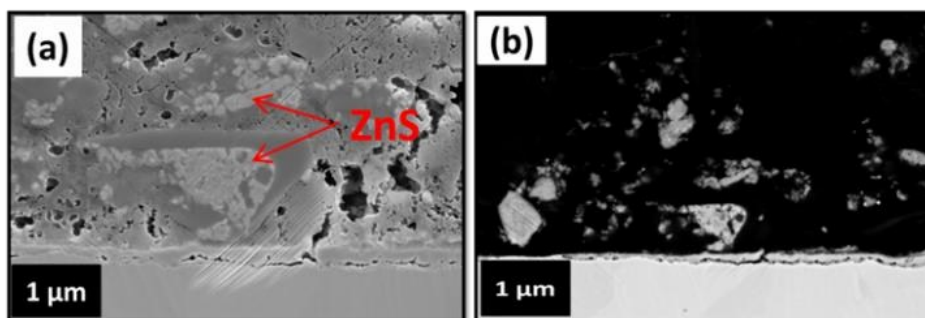

**Figure S3.** FESEM images of cross-sectioned ZnS/NSC-800 electrode

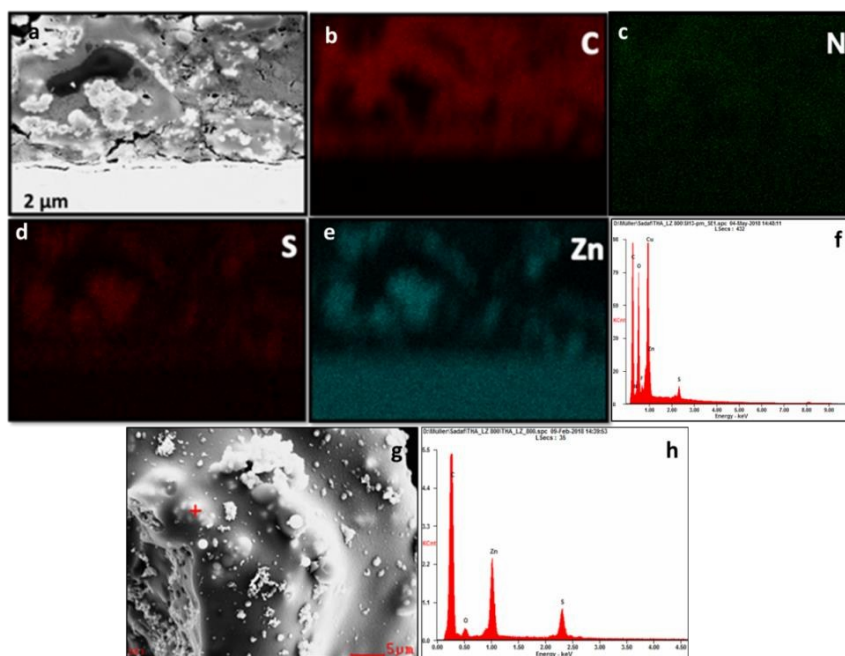

**Figure S4.** Elemental mapping images and the corresponding EDX spectra of ZnS/NSC-800

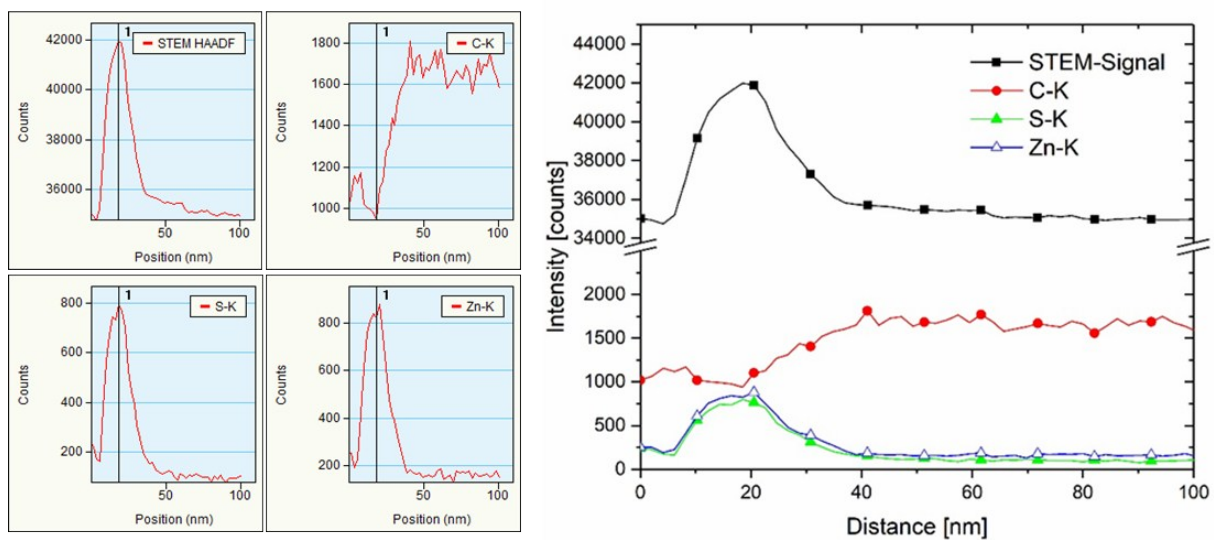

Figure S5: EDX line profile of ZnS/NSC-900

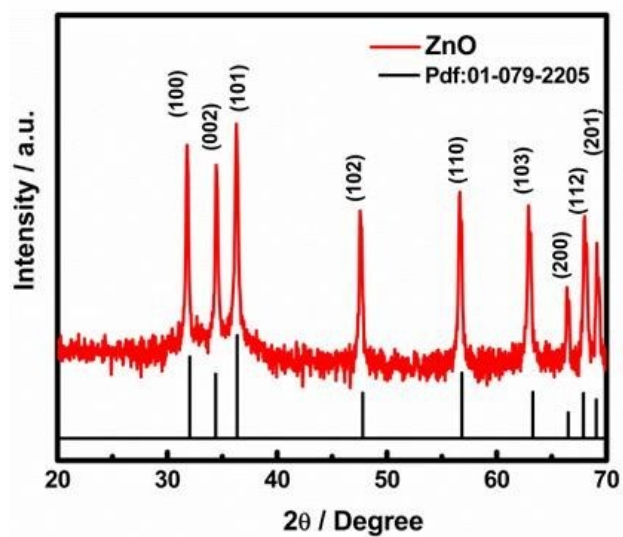

Figure S6. XRD diffraction pattern of the TGA residue

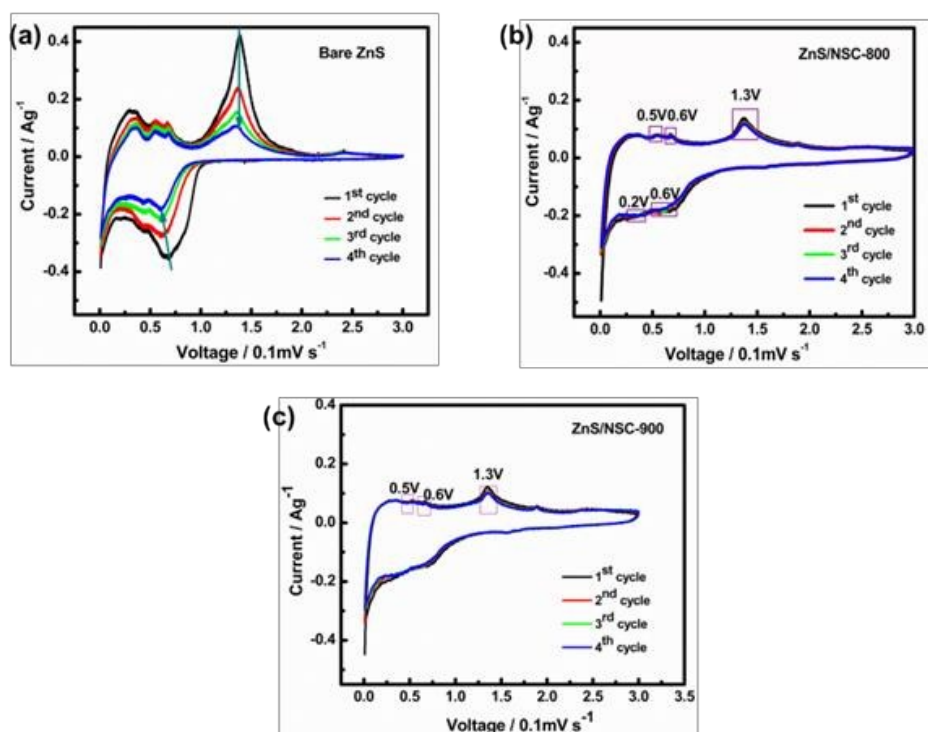

**Figure S7.** Cyclic voltammogram of (a) Bare ZnS (b) ZnS/NSC-800 and (c) ZnS/NSC-900

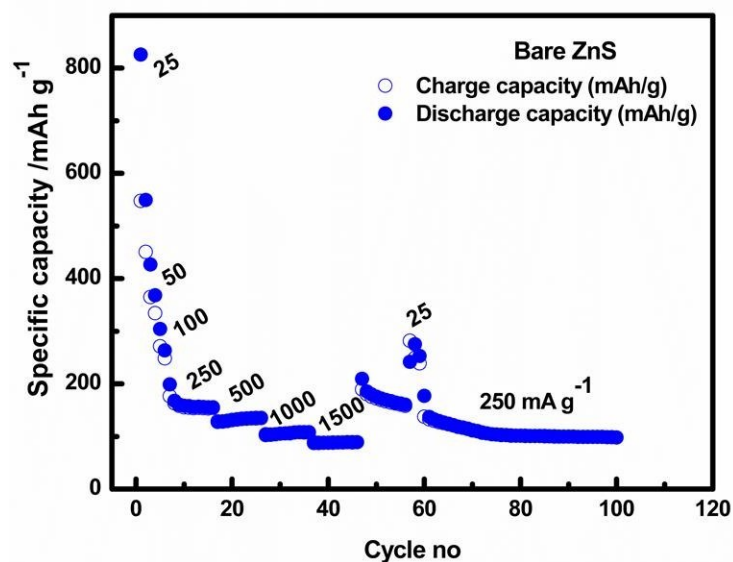

**Figure S8.** Cycling stability of bare ZnS

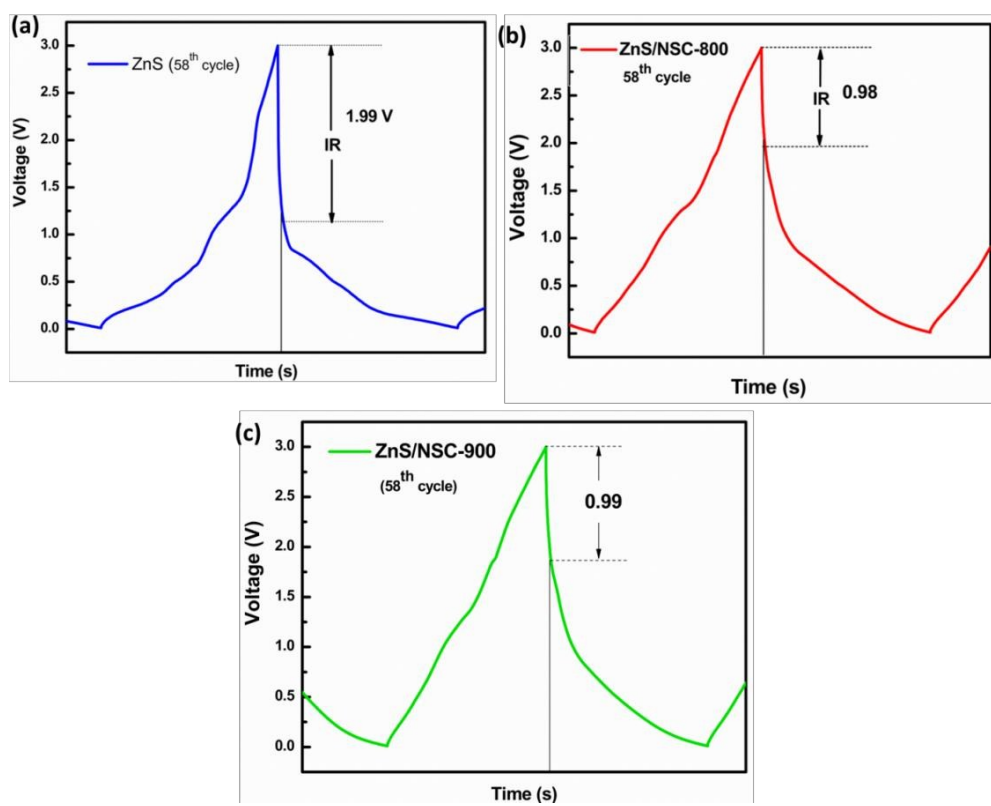

**Figure S9.** Comparison of Ohmic drop (Resistance) after cycling
